# Supplementary material for: Accelerated DNA methylation age and medication use among African Americans
Source: publisher site journal article supplement (doi:10.18632/aging.203115), 2021-06-03
Supplement: Supplementary file [file aging-v13i11-203115-supplementary-material-SD2.pdf]

## SUPPLEMENTARY TABLES

**Supplementary Table 1. Medication use by first two digits of medi-span therapeutic classification (MTC) drug classification code in the genetic epidemiology network of arteriopathy (GENOA).**

|                          | First two digits of MTC code | Cross-Sectional<br>(N=1,100) | Longitudinal<br>(N=266) |         |
|--------------------------|------------------------------|------------------------------|-------------------------|---------|
|                          |                              | Phase 1                      | Phase 1                 | Phase 2 |
| Diuretics                | D37                          | 377                          | 79                      | 109     |
| Calcium channel blockers | D34                          | 221                          | 58                      | 77      |
| Beta blockers            | D33                          | 118                          |                         |         |
| Antihypertensives        | D36                          | 321                          | 73                      | 107     |
| Alpha blockers           |                              | 59                           |                         |         |
| Sympatholytics           |                              | 54                           |                         |         |
| RAAS inhibitors          |                              | 207                          |                         |         |
| Antihyperlipidemics      | D39                          | 62                           |                         |         |
| Statins                  |                              | 51                           |                         |         |
| Diabetes medications     | D27                          | 164                          | 32                      | 56      |
| Sulfonylureas            |                              | 82                           |                         |         |
| Insulins                 |                              | 78                           |                         |         |
| Non-narcotic analgesics  | D64                          | 141                          |                         |         |
| NSAID analgesics         | D66                          | 130                          | 36                      | 38      |
| Antidepressants          | D58                          | 60                           |                         |         |
| Antihistamines           | D41                          | 53                           |                         |         |
| Antianxiety medications  | D57                          | 48                           |                         |         |
| Narcotic analgesics      | D30                          | 30                           |                         |         |

NSAID: nonsteroidal anti-inflammatory drug; RAAS: renin–angiotensin–aldosterone system.

Number of participants taking each drug category is displayed. Medication use in GENOA was categorized using the first two digits of MTC drug classification code. For categories of antihypertensives, antihyperlipidemics, and diabetes medication, sub-categories were included. Drug categories with N < 30 were excluded.

**Supplementary Table 2. P-value from Chi-square test of independence among medication categories.**

|                          | Calcium channel blockers | Beta blockers | Alpha blockers | Sympatholytics | RAAS inhibitors | Statins | Sulfonylureas | Insulins | Non-narcotic analgesics | NSAID analgesics | Antidepressants | Antihistamines | Antianxiety medications | Narcotic analgesics |
|--------------------------|--------------------------|---------------|----------------|----------------|-----------------|---------|---------------|----------|-------------------------|------------------|-----------------|----------------|-------------------------|---------------------|
| Diuretics                | 3.1E-04                  | 4.7E-11       | 0.02           | 4.2E-04        | 1.3E-10         | 2.5E-03 | 0.02          | 0.02     | 2.7E-04                 | 8.7E-05          | 0.10            | 5.6E-03        | 0.03                    | 0.28                |
| Calcium channel blockers |                          | 1.00          | 0.91           | 0.90           | 0.69            | 0.01    | 0.02          | 0.16     | 9.6E-10                 | 0.75             | 3.7E-05         | 0.09           | 0.29                    | 0.48                |
| Beta blockers            |                          |               | 0.35           | 0.14           | 0.94            | 0.06    | 1.00          | 0.42     | 2.8E-05                 | 0.89             | 0.03            | 0.20           | 8.2E-06                 | 0.30                |
| Alpha blockers           |                          |               |                | 1.00           | 0.89            | 1.00    | 0.11          | 0.87     | 0.24                    | 0.83             | 0.18            | 0.68           | 0.06                    | 1.00                |
| Sympatholytics           |                          |               |                |                | 0.81            | 1.00    | 0.80          | 0.72     | 0.86                    | 0.63             | 0.78            | 0.95           | 1.00                    | 0.38                |
| RAAS inhibitors          |                          |               |                |                |                 | 0.15    | 9.1E-11       | 5.4E-11  | 4.1E-06                 | 0.82             | 0.68            | 0.36           | 0.04                    | 1.00                |
| Statins                  |                          |               |                |                |                 |         | 0.35          | 0.01     | 0.03                    | 0.51             | 0.65            | 0.49           | 0.11                    | 1.00                |
| Sulfonylureas            |                          |               |                |                |                 |         |               | 0.89     | 0.02                    | 1.00             | 0.31            | 0.06           | 1.00                    | 0.60                |
| Insulins                 |                          |               |                |                |                 |         |               |          | 3.5E-07                 | 0.23             | 0.03            | 0.89           | 0.53                    | 1.00                |
| Non-narcotic analgesics  |                          |               |                |                |                 |         |               |          |                         | 0.03             | 1.8E-05         | 0.47           | 0.55                    | 0.46                |
| NSAID analgesics         |                          |               |                |                |                 |         |               |          |                         |                  | 0.32            | 3.3E-04        | 1.8E-03                 | 6.4E-04             |
| Antidepressants          |                          |               |                |                |                 |         |               |          |                         |                  |                 | 4.3E-03        | 0.57                    | 1.00                |
| Antihistamines           |                          |               |                |                |                 |         |               |          |                         |                  |                 |                | 0.03                    | 0.96                |
| Antianxiety medications  |                          |               |                |                |                 |         |               |          |                         |                  |                 |                |                         | 1.00                |

NSAID: nonsteroidal anti-inflammatory drug; RAAS: Renin-angiotensin-aldosterone system.  
P < 0.05 is highlighted.

**Supplementary Table 3. Association of DNA methylation age acceleration with medication use using multivariable models among those with hypertension.**

|                          | HorvathAA (N=779) |              |         |              |         |              | HannumAA (N=779) |               |         |               |         |                |
|--------------------------|-------------------|--------------|---------|--------------|---------|--------------|------------------|---------------|---------|---------------|---------|----------------|
|                          | Model 1           |              | Model 2 |              | Model 3 |              | Model 1          |               | Model 2 |               | Model 3 |                |
|                          | Beta              | P-value      | Beta    | P-value      | Beta    | P-value      | Beta             | P-value       | Beta    | P-value       | Beta    | P-value        |
| Diuretics                | 0.16              | 0.680        | 0.24    | 0.536        | 0.17    | 0.652        | 0.27             | 0.455         | 0.34    | 0.350         | 0.25    | 0.460          |
| Calcium channel blockers | -1.21             | <b>0.005</b> | -1.17   | <b>0.006</b> | -1.13   | <b>0.006</b> | -1.30            | <b>0.001*</b> | -1.36   | <b>0.001*</b> | -1.33   | <b>0.0003*</b> |
| Beta blockers            | -0.13             | 0.815        | -0.06   | 0.907        | -0.15   | 0.775        | -1.16            | <b>0.022</b>  | -1.04   | <b>0.039</b>  | -1.13   | <b>0.016</b>   |
| Alpha blockers           | -1.37             | 0.053        | -1.16   | 0.101        | -1.04   | 0.128        | -0.34            | 0.603         | -0.22   | 0.738         | 0.00    | 0.997          |
| Sympatholytics           | -0.21             | 0.775        | -0.34   | 0.642        | -0.55   | 0.438        | 0.11             | 0.876         | -0.13   | 0.844         | -0.40   | 0.532          |
| RAAS inhibitors          | 0.17              | 0.705        | 0.05    | 0.911        | -0.04   | 0.923        | -0.10            | 0.817         | -0.16   | 0.705         | -0.27   | 0.489          |
| Statins                  | -0.01             | 0.988        | 0.11    | 0.884        | 0.15    | 0.844        | 0.15             | 0.839         | 0.30    | 0.680         | 0.40    | 0.561          |
| Sulfonylureas            | 1.39              | <b>0.034</b> | 1.29    | <b>0.049</b> | 1.32    | <b>0.038</b> | 0.64             | 0.285         | 0.49    | 0.422         | 0.56    | 0.329          |
| Insulins                 | 1.37              | <b>0.041</b> | 1.17    | 0.081        | 1.05    | 0.103        | 1.46             | <b>0.018</b>  | 1.42    | <b>0.022</b>  | 1.16    | <b>0.047</b>   |
| Non-narcotic analgesics  | -0.04             | 0.934        | -0.31   | 0.566        | 0.15    | 0.781        | -0.48            | 0.324         | -0.60   | 0.224         | -0.09   | 0.852          |
| NSAID analgesics         | -0.68             | 0.226        | -0.75   | 0.180        | -0.85   | 0.116        | -0.48            | 0.351         | -0.48   | 0.353         | -0.55   | 0.250          |
| Antidepressants          | 0.75              | 0.328        | 0.70    | 0.354        | 0.66    | 0.365        | 0.49             | 0.488         | 0.41    | 0.553         | 0.38    | 0.567          |
| Antihistamines           | 0.10              | 0.904        | 0.06    | 0.937        | -0.04   | 0.961        | 0.28             | 0.710         | 0.31    | 0.682         | 0.22    | 0.756          |
| Anti-anxiety medications | -0.14             | 0.873        | -0.12   | 0.888        | -0.37   | 0.653        | -0.17            | 0.829         | -0.15   | 0.851         | -0.23   | 0.755          |
| Narcotic analgesics      | -0.25             | 0.840        | -0.24   | 0.846        | -0.36   | 0.763        | -0.01            | 0.990         | -0.29   | 0.801         | -0.45   | 0.672          |
|                          | PhenoAA (N=778)   |              |         |              |         |              | GrimAA (N=779)   |               |         |               |         |                |
|                          | Model 1           |              | Model 2 |              | Model 3 |              | Model 1          |               | Model 2 |               | Model 3 |                |
|                          | Beta              | P-value      | Beta    | P-value      | Beta    | P-value      | Beta             | P-value       | Beta    | P-value       | Beta    | P-value        |
| Diuretics                | 0.63              | 0.246        | 0.72    | 0.187        | 0.79    | 0.119        | -0.25            | 0.469         | 0.13    | 0.644         | 0.24    | 0.373          |
| Calcium channel blockers | -0.40             | 0.505        | -0.50   | 0.397        | -0.44   | 0.414        | 0.38             | 0.310         | 0.27    | 0.389         | 0.30    | 0.302          |
| Beta blockers            | -0.11             | 0.881        | -0.03   | 0.973        | -0.27   | 0.693        | -0.39            | 0.413         | -0.23   | 0.552         | -0.36   | 0.333          |
| Alpha blockers           | -2.18             | <b>0.027</b> | -2.06   | <b>0.036</b> | -2.25   | <b>0.013</b> | 0.39             | 0.534         | 0.42    | 0.410         | 0.17    | 0.731          |
| Sympatholytics           | -0.08             | 0.941        | -0.30   | 0.768        | -0.72   | 0.445        | 0.68             | 0.294         | 0.44    | 0.405         | 0.20    | 0.690          |
| RAAS inhibitors          | 0.05              | 0.939        | 0.03    | 0.955        | -0.27   | 0.638        | 0.45             | 0.254         | 0.63    | 0.050         | 0.48    | 0.114          |
| Statins                  | 0.33              | 0.762        | 0.35    | 0.745        | -0.30   | 0.766        | 1.89             | <b>0.006</b>  | 1.28    | <b>0.024</b>  | 0.83    | 0.122          |
| Sulfonylureas            | 1.81              | <b>0.048</b> | 1.77    | 0.053        | 1.80    | <b>0.033</b> | 0.77             | 0.177         | 0.74    | 0.118         | 0.60    | 0.179          |
| Insulins                 | 2.17              | <b>0.020</b> | 2.15    | <b>0.020</b> | 1.41    | 0.099        | 0.60             | 0.299         | 1.07    | <b>0.026</b>  | 0.80    | 0.082          |
| Non-narcotic analgesics  | 0.96              | 0.194        | 0.77    | 0.295        | 0.74    | 0.285        | 0.87             | 0.062         | 0.78    | <b>0.043</b>  | 0.49    | 0.179          |
| NSAID analgesics         | -1.35             | 0.082        | -1.29   | 0.095        | -1.24   | 0.079        | -0.40            | 0.412         | -0.10   | 0.797         | -0.07   | 0.848          |
| Antidepressants          | 1.61              | 0.127        | 1.48    | 0.158        | 1.41    | 0.144        | 1.03             | 0.121         | 0.71    | 0.194         | 0.75    | 0.147          |
| Antihistamines           | 0.13              | 0.908        | 0.34    | 0.766        | 0.62    | 0.555        | -0.94            | 0.189         | -0.39   | 0.507         | -0.26   | 0.634          |
| Anti-anxiety medications | -1.67             | 0.165        | -1.54   | 0.198        | -1.58   | 0.154        | 0.52             | 0.494         | 0.22    | 0.723         | 0.09    | 0.878          |
| Narcotic analgesics      | 0.55              | 0.744        | -0.11   | 0.950        | -0.52   | 0.736        | 1.03             | 0.341         | -0.28   | 0.750         | -0.61   | 0.470          |

GrimAA: DNA methylation GrimAge acceleration; HannumAA: DNA methylations HannumAge acceleration; HorvathAA: DNA methylations HorvathAge acceleration; NSAID: nonsteroidal anti-inflammatory drug; PhenoAA: DNA methylations PhenoAge acceleration; RAAS: Renin-angiotensin-aldosterone system.

Model 1: DNA methylation age acceleration~ age + sex + 15 medication use variables.

Model 2: DNA methylation age acceleration~ age + sex + 15 medication use variables + education + smoking + alcohol consumption + BMI + random effects.

Model 3: DNA methylation age acceleration~ age + sex + 15 medication use variables + education + smoking + alcohol consumption + BMI + random effects + white blood cell proportion.

Medication use variables: Diuretic + Calcium channel blockers + Beta blockers + Alpha blockers + Sympatholytics + RAAS inhibitors + Statins + Sulfonylureas + Insulin + Non-narcotic analgesics + NSAID analgesics + Antidepressants + Antihistamines + Anti-anxiety medications + Narcotic analgesics.

Bold values denote significance at  $P < 0.05$ . Asterisk denotes Bonferroni corrected significance at  $P < 0.05/15=0.003$ .

**Supplementary Table 4. Interactions between medication use and sex on DNAm age acceleration.**

|                          | HorvathAA (N=1,100) |              |         |              |         |                | HannumAA (N=1,100) |         |         |         |         |              |
|--------------------------|---------------------|--------------|---------|--------------|---------|----------------|--------------------|---------|---------|---------|---------|--------------|
|                          | Model 1             |              | Model 2 |              | Model 3 |                | Model 1            |         | Model 2 |         | Model 3 |              |
|                          | Beta                | P-value      | Beta    | P-value      | Beta    | P-value        | Beta               | P-value | Beta    | P-value | Beta    | P-value      |
| Diuretics                | -0.83               | 0.276        | -0.63   | 0.402        | -0.19   | 0.790          | -0.43              | 0.543   | -0.36   | 0.608   | 0.16    | 0.813        |
| Calcium channel blockers | -0.28               | 0.740        | -0.34   | 0.682        | 0.00    | 0.998          | -0.03              | 0.965   | -0.09   | 0.912   | 0.09    | 0.897        |
| Beta blockers            | -0.83               | 0.463        | -0.75   | 0.506        | -0.93   | 0.394          | 1.60               | 0.125   | 1.67    | 0.110   | 1.36    | 0.165        |
| Alpha blockers           | -1.09               | 0.415        | -1.11   | 0.404        | -1.70   | 0.186          | -0.91              | 0.462   | -1.10   | 0.374   | -1.87   | 0.107        |
| Sympatholytics           | 1.50                | 0.314        | 1.78    | 0.228        | 1.48    | 0.300          | 0.33               | 0.813   | 0.52    | 0.707   | 0.21    | 0.868        |
| RAAS inhibitors          | -2.34               | <b>0.004</b> | -2.27   | <b>0.006</b> | -2.51   | <b>0.0015*</b> | -1.04              | 0.173   | -1.00   | 0.187   | -1.44   | <b>0.044</b> |
| Statins                  | 1.54                | 0.346        | 1.92    | 0.239        | 2.36    | 0.133          | 0.23               | 0.882   | 0.36    | 0.810   | 0.84    | 0.555        |
| Sulfonylureas            | -1.57               | 0.192        | -1.45   | 0.227        | -1.39   | 0.230          | 0.03               | 0.982   | -0.15   | 0.894   | -0.34   | 0.748        |
| Insulins                 | -2.55               | <b>0.048</b> | -2.22   | 0.085        | -2.45   | <b>0.049</b>   | -0.60              | 0.620   | -0.37   | 0.756   | -0.67   | 0.553        |
| Non-narcotic analgesics  | -0.01               | 0.995        | 0.07    | 0.942        | -0.06   | 0.948          | 0.80               | 0.360   | 0.72    | 0.407   | 0.51    | 0.532        |
| NSAID analgesics         | 0.30                | 0.767        | 0.19    | 0.848        | 1.09    | 0.262          | 1.00               | 0.288   | 0.90    | 0.336   | 1.77    | <b>0.043</b> |
| Antidepressants          | -0.26               | 0.868        | -0.17   | 0.916        | -0.80   | 0.594          | 1.01               | 0.488   | 1.15    | 0.425   | 0.26    | 0.846        |
| Antihistamines           | 0.31                | 0.851        | 0.27    | 0.870        | 0.20    | 0.902          | -0.18              | 0.905   | -0.37   | 0.806   | -0.52   | 0.713        |
| Antianxiety medications  | 0.01                | 0.997        | 0.34    | 0.831        | 0.43    | 0.782          | 2.57               | 0.084   | 2.75    | 0.065   | 2.13    | 0.130        |
| Narcotic analgesics      | 3.00                | 0.107        | 2.69    | 0.148        | 2.39    | 0.182          | 0.69               | 0.690   | 0.61    | 0.721   | 0.40    | 0.803        |

  

|                          | PhenoAA (N=1,099) |         |         |         |         |         | GrimAA (N=1,099) |         |         |              |         |         |
|--------------------------|-------------------|---------|---------|---------|---------|---------|------------------|---------|---------|--------------|---------|---------|
|                          | Model 1           |         | Model 2 |         | Model 3 |         | Model 1          |         | Model 2 |              | Model 3 |         |
|                          | Beta              | P-value | Beta    | P-value | Beta    | P-value | Beta             | P-value | Beta    | P-value      | Beta    | P-value |
| Diuretics                | 0.09              | 0.928   | 0.17    | 0.872   | 0.44    | 0.652   | 0.31             | 0.661   | 0.35    | 0.536        | 0.33    | 0.532   |
| Calcium channel blockers | -1.25             | 0.276   | -1.34   | 0.242   | -0.65   | 0.544   | -0.94            | 0.219   | -0.95   | 0.126        | -0.66   | 0.257   |
| Beta blockers            | 1.30              | 0.400   | 0.91    | 0.557   | 0.85    | 0.556   | 0.91             | 0.380   | -0.01   | 0.992        | 0.21    | 0.787   |
| Alpha blockers           | 0.94              | 0.608   | 0.66    | 0.717   | -0.47   | 0.781   | 0.69             | 0.574   | 0.45    | 0.652        | 0.26    | 0.780   |
| Sympatholytics           | -0.54             | 0.793   | -0.15   | 0.941   | -0.93   | 0.626   | -0.63            | 0.644   | 0.02    | 0.985        | -0.45   | 0.659   |
| RAAS inhibitors          | -0.95             | 0.402   | -0.81   | 0.472   | -1.23   | 0.242   | -1.01            | 0.184   | -0.59   | 0.330        | -0.60   | 0.291   |
| Statins                  | -2.51             | 0.267   | -1.97   | 0.380   | -1.26   | 0.548   | -1.00            | 0.501   | -0.52   | 0.663        | -0.34   | 0.761   |
| Sulfonylureas            | -0.13             | 0.937   | -0.31   | 0.855   | 0.45    | 0.772   | -0.20            | 0.857   | -0.66   | 0.459        | -0.10   | 0.905   |
| Insulins                 | 0.00              | 0.999   | 0.30    | 0.866   | -0.47   | 0.778   | 0.40             | 0.739   | 0.42    | 0.661        | 0.03    | 0.976   |
| Non-narcotic analgesics  | 0.08              | 0.951   | 0.11    | 0.934   | 0.32    | 0.792   | -0.75            | 0.385   | -0.98   | 0.157        | -0.79   | 0.227   |
| NSAID analgesics         | 0.62              | 0.656   | 0.50    | 0.719   | 0.94    | 0.467   | 1.59             | 0.086   | 1.32    | 0.077        | 1.20    | 0.088   |
| Antidepressants          | 1.52              | 0.480   | 1.55    | 0.466   | 1.23    | 0.534   | -0.13            | 0.929   | 0.18    | 0.874        | 0.30    | 0.783   |
| Antihistamines           | 1.02              | 0.653   | 1.04    | 0.645   | 0.15    | 0.942   | 2.68             | 0.076   | 2.46    | <b>0.043</b> | 2.02    | 0.077   |
| Antianxiety medications  | 0.08              | 0.971   | -0.38   | 0.865   | -1.41   | 0.505   | 0.49             | 0.740   | -1.28   | 0.285        | -1.35   | 0.231   |
| Narcotic analgesics      | 1.96              | 0.441   | 1.76    | 0.488   | 0.93    | 0.693   | -0.11            | 0.948   | -0.50   | 0.716        | -0.90   | 0.485   |

GrimAA: DNA methylation GrimAge acceleration; HannumAA: DNA methylations HannumAge acceleration; HorvathAA: DNA methylations HorvathAge acceleration; NSAID: nonsteroidal anti-inflammatory drug; PhenoAA: DNA methylations PhenoAge acceleration; RAAS: Renin-angiotensin-aldosterone system.

Model 1: DNA methylation age acceleration ~ age + sex + medication use (one at a time) + medication use\*sex.

Model 2: DNA methylation age acceleration ~ age + sex + medication use (one at a time) + education + smoking + alcohol consumption + BMI + medication use\*sex.

Model 3: DNA methylation age acceleration ~ age + sex + medication use (one at a time) + education + smoking + alcohol consumption + BMI + white blood cell proportions + medication use\*sex.

Beta is the regression coefficient of the interaction term between respective medication variable and sex from the regression model as stated above.

Bold values denote significance at P < 0.05.

Asterisk denotes Bonferroni corrected significance at P < 0.05/15=0.003.

**Supplementary Table 5. Associations of GrimAge components with statin use using multivariable models (N=1,100).**

| GrimAge Component | Model 1 |          |              | Model 2 |          |              | Model 3 |          |         |
|-------------------|---------|----------|--------------|---------|----------|--------------|---------|----------|---------|
|                   | Beta    | SD       | P-value      | Beta    | SD       | P-value      | Beta    | SD       | P-value |
| DNAmADM           | 4.91    | 2.36     | <b>0.038</b> | 5.16    | 2.35     | <b>0.028</b> | 3.35    | 2.30     | 0.145   |
| DNAmB2M           | 8345.00 | 20252.93 | 0.680        | 8116.31 | 20282.21 | 0.689        | 6713.34 | 20211.28 | 0.740   |
| DNAmCystatinC     | 7434.12 | 3236.05  | <b>0.022</b> | 7884.45 | 3239.36  | <b>0.015</b> | 4816.55 | 3007.28  | 0.110   |
| DNAmGDF15         | 25.80   | 15.88    | 0.105        | 21.82   | 15.55    | 0.161        | 12.42   | 15.34    | 0.418   |
| DNAmLeptin        | -59.50  | 258.21   | 0.818        | -8.68   | 257.52   | 0.973        | 53.35   | 258.07   | 0.836   |
| DNAmPACKYRS       | 3.04    | 1.82     | 0.094        | 1.11    | 1.22     | 0.366        | 0.68    | 1.22     | 0.579   |
| DNAmPAI1          | 596.35  | 365.89   | 0.103        | 622.38  | 347.12   | 0.073        | 449.63  | 343.95   | 0.191   |
| DNAmTIMP1         | 334.04  | 143.42   | <b>0.020</b> | 362.00  | 143.71   | <b>0.012</b> | 232.06  | 136.51   | 0.089   |

DNAmADM: DNAm surrogate of adrenomedullin (ADM); DNAmB2M: DNAm surrogate of beta-2 microglobulin (B2M), DNAmGDF15: DNAm.

surrogate of growth differentiation factor 15 (GDF15); DNAmCystatinC: DNAm surrogate of Cystatin C (CystatinC); DNAmLeptin: DNAm.

surrogate of leptin (Leptin); DNAmPAI1: DNAm surrogate of plasminogen activation inhibitor 1 (PAI1); DNAmTIMP1: DNAm surrogate of

Issue inhibitor metalloproteinase 1 (TIMP1); DNAmPACKYRS: DNAm surrogate of the amount of cigarettes smoked (PACKYRS).

Model 1: DNA methylation GrimAge components ~ age + sex + medication use (one at a time).

Model 2: DNA methylation GrimAge components ~ age + sex + medication use (one at a time) + education + smoking + alcohol consumption + BMI.

Model 3: DNA methylation GrimAge components ~ age + sex + medication use (one at a time) + education + smoking + alcohol consumption + BMI + white blood cell proportions.

Beta is the regression coefficient of the respective variable from the regression model as stated above.

Bold values denote statistical significance at P < 0.05.

**Supplementary Table 6. Association of medication use with change rate of DNA methylation age acceleration from Phase 1 to Phase 2 using multivariable models (N=266).**

| Change of medication use | HorvathAA                 |         |                |         |               |         | HannumAA      |         |               |         |               |         |               |
|--------------------------|---------------------------|---------|----------------|---------|---------------|---------|---------------|---------|---------------|---------|---------------|---------|---------------|
|                          | Model 1                   |         | Model 2        |         | Model 3       |         | Model 1       |         | Model 2       |         | Model 3       |         |               |
|                          | Beta                      | P-value | Beta           | P-value | Beta          | P-value | Beta          | P-value | Beta          | P-value | Beta          | P-value |               |
| Diuretics                | Never used                | Ref     |                | Ref     |               | Ref     |               | Ref     |               | Ref     |               | Ref     |               |
|                          | Continuous use            | 0.98    | 0.112          | 1.27    | 0.054         | 1.25    | 0.063         | 0.10    | 0.834         | -0.14   | 0.787         | -0.21   | 0.687         |
|                          | Started use after Phase 1 | -0.74   | 0.246          | -0.59   | 0.370         | -0.52   | 0.434         | 0.16    | 0.762         | 0.06    | 0.915         | 0.04    | 0.934         |
|                          | Stopped use after Phase 1 | 0.56    | 0.540          | 0.67    | 0.502         | 0.69    | 0.509         | 0.38    | 0.608         | 0.10    | 0.902         | 0.06    | 0.940         |
| Calcium channel blockers | Never used                | Ref     |                | Ref     |               | Ref     |               | Ref     |               | Ref     |               | Ref     |               |
|                          | Continuous use            | 0.59    | 0.331          | 0.80    | 0.215         | 0.84    | 0.208         | 0.13    | 0.788         | 0.02    | 0.976         | -0.03   | 0.950         |
|                          | Started use after Phase 1 | -0.56   | 0.414          | -0.39   | 0.579         | -0.25   | 0.729         | 0.66    | 0.231         | 0.61    | 0.271         | 0.57    | 0.315         |
|                          | Stopped use after Phase 1 | 0.95    | 0.372          | 1.28    | 0.248         | 1.28    | 0.261         | 0.81    | 0.342         | 0.48    | 0.579         | 0.47    | 0.600         |
| Antihypertensives        | Never used                | Ref     |                | Ref     |               | Ref     |               | Ref     |               | Ref     |               | Ref     |               |
|                          | Continuous use            | -0.96   | 0.112          | -0.71   | 0.278         | -0.69   | 0.298         | 0.24    | 0.627         | 0.14    | 0.779         | 0.26    | 0.624         |
|                          | Started use after Phase 1 | -0.65   | 0.299          | -0.54   | 0.397         | -0.60   | 0.358         | -0.52   | 0.300         | -0.54   | 0.284         | -0.46   | 0.374         |
|                          | Stopped use after Phase 1 | -0.34   | 0.727          | 0.09    | 0.932         | 0.10    | 0.922         | -0.71   | 0.374         | -1.06   | 0.198         | -0.92   | 0.268         |
| Diabetes medications     | Never used                | Ref     |                | Ref     |               | Ref     |               | Ref     |               | Ref     |               | Ref     |               |
|                          | Continuous use            | 0.45    | 0.531          | 0.67    | 0.627         | 0.82    | 0.560         | 0.29    | 0.617         | 1.66    | 0.128         | 1.62    | 0.141         |
|                          | Started use after Phase 1 | 0.49    | 0.511          | 0.82    | 0.353         | 0.97    | 0.285         | -1.00   | 0.096         | -0.30   | 0.662         | -0.24   | 0.733         |
|                          | Stopped use after Phase 1 | -5.28   | 0.131          | -5.42   | 0.195         | -5.60   | 0.188         | 1.31    | 0.640         | 1.19    | 0.718         | 1.23    | 0.712         |
| NSAID analgesics         | Never used                | Ref     |                | Ref     |               | Ref     |               | Ref     |               | Ref     |               | Ref     |               |
|                          | Continuous use            | -0.12   | 0.917          | 0.10    | 0.933         | 0.12    | 0.920         | 0.18    | 0.846         | -0.25   | 0.783         | -0.20   | 0.825         |
|                          | Started use after Phase 1 | 2.64    | <b>0.0004*</b> | 2.61    | <b>0.001*</b> | 2.50    | <b>0.001*</b> | 1.28    | <b>0.032</b>  | 1.29    | <b>0.028</b>  | 1.30    | <b>0.030</b>  |
|                          | Stopped use after Phase 1 | 1.83    | <b>0.017</b>   | 2.01    | <b>0.010</b>  | 2.00    | <b>0.011</b>  | 0.19    | 0.760         | 0.41    | 0.497         | 0.43    | 0.485         |
| Change of medication use | PhenoAA                   |         |                |         |               |         | GrimAA        |         |               |         |               |         |               |
|                          | Model 1                   |         | Model 2        |         | Model 3       |         | Model 1       |         | Model 2       |         | Model 3       |         |               |
|                          | Beta                      | P-value | Beta           | P-value | Beta          | P-value | Beta          | P-value | Beta          | P-value | Beta          | P-value |               |
| Diuretics                | Never used                | Ref     |                | Ref     |               | Ref     |               | Ref     |               | Ref     |               | Ref     |               |
|                          | Continuous use            | 0.28    | 0.696          | -0.35   | 0.648         | -0.67   | 0.378         | 0.14    | 0.683         | 0.11    | 0.762         | 0.03    | 0.942         |
|                          | Started use after Phase 1 | 0.27    | 0.718          | 0.02    | 0.978         | 0.02    | 0.975         | -0.01   | 0.977         | -0.08   | 0.838         | -0.10   | 0.790         |
|                          | Stopped use after Phase 1 | -1.12   | 0.300          | -1.65   | 0.158         | -1.89   | 0.108         | 0.21    | 0.688         | 0.19    | 0.729         | 0.08    | 0.885         |
| Calcium channel blockers | Never used                | Ref     |                | Ref     |               | Ref     |               | Ref     |               | Ref     |               | Ref     |               |
|                          | Continuous use            | 0.13    | 0.853          | -0.34   | 0.646         | -0.32   | 0.666         | 0.01    | 0.967         | -0.02   | 0.957         | -0.04   | 0.913         |
|                          | Started use after Phase 1 | -1.10   | 0.168          | -1.37   | 0.093         | -1.40   | 0.089         | 0.09    | 0.814         | 0.05    | 0.901         | -0.09   | 0.814         |
|                          | Stopped use after Phase 1 | 1.45    | 0.240          | 0.89    | 0.487         | 0.37    | 0.771         | 1.17    | <b>0.049</b>  | 1.22    | <b>0.049</b>  | 1.06    | 0.091         |
| Antihypertensives        | Never used                | Ref     |                | Ref     |               | Ref     |               | Ref     |               | Ref     |               | Ref     |               |
|                          | Continuous use            | 0.06    | 0.934          | -0.40   | 0.599         | -0.31   | 0.679         | -0.25   | 0.469         | -0.40   | 0.273         | -0.36   | 0.334         |
|                          | Started use after Phase 1 | -1.65   | <b>0.024</b>   | -1.72   | <b>0.021</b>  | -1.90   | <b>0.011</b>  | -0.97   | <b>0.006*</b> | -0.97   | <b>0.007*</b> | -0.96   | <b>0.009*</b> |
|                          | Stopped use after Phase   | 0.35    | 0.761          | -0.47   | 0.696         | -0.43   | 0.720         | -0.47   | 0.394         | -0.50   | 0.390         | -0.46   | 0.425         |
| Diabetes medications     | Never used                | Ref     |                | Ref     |               | Ref     |               | Ref     |               | Ref     |               | Ref     |               |
|                          | Continuous use            | 1.10    | 0.192          | 3.09    | 0.053         | 2.92    | 0.067         | 0.48    | 0.234         | 0.61    | 0.428         | 0.41    | 0.596         |
|                          | Started use after Phase 1 | 0.28    | 0.744          | 0.63    | 0.535         | 0.61    | 0.548         | 0.07    | 0.862         | 0.09    | 0.849         | -0.02   | 0.963         |
|                          | Stopped use after Phase 1 | -1.51   | 0.710          | -0.35   | 0.941         | -2.29   | 0.633         | -0.08   | 0.967         | 0.08    | 0.974         | -0.35   | 0.881         |
| NSAID analgesics         | Never used                | Ref     |                | Ref     |               | Ref     |               | Ref     |               | Ref     |               | Ref     |               |
|                          | Continuous use            | -1.36   | 0.293          | -1.83   | 0.169         | -1.68   | 0.200         | -0.52   | 0.393         | -0.59   | 0.355         | -0.53   | 0.406         |
|                          | Started use after Phase 1 | 0.49    | 0.568          | 0.48    | 0.576         | 0.44    | 0.610         | 0.14    | 0.734         | 0.12    | 0.777         | 0.16    | 0.709         |
|                          | Stopped use after Phase 1 | 1.57    | 0.074          | 1.66    | 0.062         | 1.59    | 0.071         | 0.35    | 0.412         | 0.34    | 0.431         | 0.33    | 0.439         |

HorvathAA: DNAm HorvathAge acceleration; HannumAA: DNAm HannumAge acceleration; GrimAA: DNAm GrimAge acceleration; PhenoAA: DNAm PhenoAge acceleration.

Longitudinal models include subjects that had DNA methylation measured at both Phases 1 and 2. Participants whose smoking status changed between Phase 1 and Phase 2 were removed.

Model 1: Change in DNA methylation age acceleration (Phase 2-Phase 1) ~ change in medication use + phase 1 covariates (age, DNAm age acceleration, sex, BMI, smoking, alcohol, education)

Model 2: Model 1 + phase 1 covariates (hypertension, stroke, coronary heart disease, diabetes, HDL, Triglyceride, LDL)

Model 3: Model 2 + blood cell proportions

Medication use variables: diuretics, calcium channel blockers, antihypertensives, diabetes medications, and NSAID analgesics

Beta is the regression coefficient of the respective variable from the regression model, as stated below.

Bold values denote significance at  $P < 0.05$ . Asterisk denotes Bonferroni corrected significance at  $P < 0.05/5 = 0.01$ .
